# Supplementary material for: A Novel bHLH Transcription Factor PtrbHLH66 from Trifoliate Orange Positively Regulates Plant Drought Tolerance by Mediating Root Growth and ROS Scavenging
Source: MDPI journal article supplement (doi:10.3390/ijms232315053), 2022-11-30
Supplement: s1 [file s1]

**Table S1. Primer sequences used for qRT-PCR analysis of drought-related genes in *PtrbHLH66* ectopic expressing *Arabidopsis***

| Name            | Accession number | Primer sequences (5'-3') |                       |
|-----------------|------------------|--------------------------|-----------------------|
|                 |                  | Forward                  | Reverse               |
| <i>AtSOD</i>    | NM_100757.4      | AACTGCCACCTTCACAAT       | AACAGCCCTACCAACAAT    |
| <i>AtPOX</i>    | NM_100404.4      | CTTGCCGCTAAACTTCTA       | CATCCACCACTTCATAACC   |
| <i>AtCAT</i>    | NM_101913.4      | GAGGAGCCAATCACAGCC       | AGAACCAAGCGACCAACC    |
| <i>AtP5CS</i>   | NM_129539.2      | GCAGGCAAAGGCTTCGTT       | TTCCCATCAAGTTCAGTC    |
| <i>AtNCED3</i>  | NM_112304.3      | GGACGGAATAAATCACC        | AAATCCCGAATCTTGC      |
| <i>AtNCED9</i>  | NM_106486.3      | TCAGAAACGGAGCAAATC       | GTAAACCGACAAGCGTAG    |
| <i>AtZEP</i>    | NM_180954.3      | GGTCAACGCTATGAAGGT       | CACTACGGCCAAACAAAT    |
| <i>AtABA2</i>   | NM_104113.5      | AGGAGCCACAGGGATAGG       | TGGACTCACCACGAAGCA    |
| <i>AtAPO3</i>   | NM_128273.3      | TGCTTATGGTCTCGGTATGG     | TAACGGCTTCACAACCTGCTC |
| <i>AtDREB1A</i> | AB007787.1       | CGGTAAGTGGGTTTGTGAGG     | CGAAATTGAGACAGGCTGAT  |
| <i>AtDREB2A</i> | AB007790.1       | GGCTGAGCGAGTTTGAACAT     | GCAACAGATAGCGAATCCTG  |
| <i>AtDREB3</i>  | AB007788.1       | AAAATGGGTGTCGGAGATTC     | AGTCAGCGAGTTCAGGGAAG  |
| <i>AtRD20</i>   | NM_128898.4      | AAACTTAGCGTTCAGC         | TCCTTCGGTGTCATAG      |
| <i>AtRD29A</i>  | NM_124610.3      | GTGACGACGAAGTTACCTAT     | CTCTTCTTCTCCTCCAATCT  |
| <i>AtERD</i>    | NM_179287.2      | TCTGAAGAAGCCAACACT       | GAAACAAATCCATAACCC    |
| <i>AtACTIN</i>  | NM_001338358.1   | GAAACCCTCGTAGATTGGCA     | CTCTCCCGCTATGTATGTCGC |
