# Supplementary material for: A Novel bHLH Transcription Factor PtrbHLH66 from Trifoliate Orange Positively Regulates Plant Drought Tolerance by Mediating Root Growth and ROS Scavenging
Source: MDPI journal article supplement (doi:10.3390/ijms232315053), 2022-11-30
Supplement: s1 [file s1]

**Table S2. Primer sequences used for qRT-PCR analysis of drought-related genes in *PtrbHLH66* homolog silencing lemon**

| Name            | Accession number | Primer sequences (5'-3') |                        |
|-----------------|------------------|--------------------------|------------------------|
|                 |                  | Forward                  | Reverse                |
| <i>CISOD</i>    | AF318938.1       | CCGTTTACTGGTCGTTT        | TGACACCCTCAGTTCCAC     |
| <i>CIPOX</i>    | KT374296.1       | CCGTAGACGAGATGGTGA       | CGTAAAGACGCTTGGAGA     |
| <i>CICAT</i>    | KF640697.1       | CGGTATTGTGGTTCCTGG       | CCCTCGTGGTGATTGTTG     |
| <i>CIP5CS</i>   | XM_025093600.1   | AGGAAATGCTGCCACCCA       | CGGAAGAAGAAAGCGAGT     |
| <i>CINCED3</i>  | AB219179.1       | CAGCAACCCAAGGAAA         | TGCGTCCAAGGCTAAA       |
| <i>CINCED9</i>  | AB219172.1       | AACAGCCTTACCCGAATC       | AGCGAAGTTACCGCCAAT     |
| <i>CIZEP</i>    | AB114670.1       | GGTCAACGCTATGAAGGT       | CACTACGGCCAAACAAAT     |
| <i>CLABA2</i>   | NM_001288867.1   | TTGGGATTCTAAGATAAAGG     | GACAGCAGGCGATGAG       |
| <i>CLAAO3</i>   | XM_006487735.3   | AAGTTGGCACAATCCTAT       | ATTCCTGTCTCATCCCTC     |
| <i>CIDREB1A</i> | XM_006490258.3   | GGTCATCGCCAGAGTCACGT     | GACTTCTTGTTTCGGCTCCCT  |
| <i>CIDREB2A</i> | XM_006478914.3   | GTCTGTCGGCAATTCATCTC     | CACCCATCATCAAATCACTC   |
| <i>CIDREB3</i>  | XM_006421783.2   | GGGTCTCCGAAATCCGTGAG     | TGCTGAGTTGCCCTTGATGC   |
| <i>CIRD20</i>   | XM_025102476.1   | GACTTATTCAGGGTTGCG       | CTCGGTGTCGTATGTTCC     |
| <i>CIRD29A</i>  | XM_006421853.2   | AAAGGTGCTGTAGGTTTCGTG    | GTTGTTATTGTTGCGTCCTG   |
| <i>AtERD</i>    | XM_025097036.1   | TCCGAATCCTCCACTT         | AACAGCACAGCCGTAA       |
| <i>CIACTIN</i>  | XM_006464503.3   | CGTATGAGCAAGGAAATCACAG   | ATTGATCCTCCAATCCAAACAC |
